# Supplementary material
Source: Springer Nature journal article supplement (http://www.springermedizin.de/resource/supplementary/12968_2012_2650_MOESM6_ESM.pdf/9582414)

**A****Infarct Segments**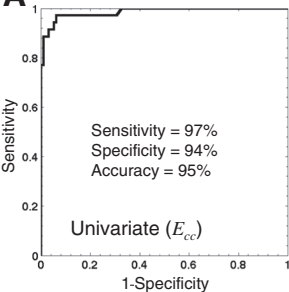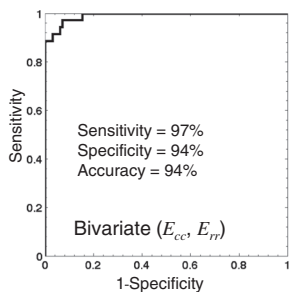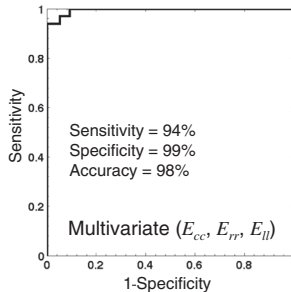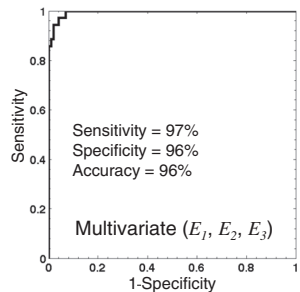**B****Adjacent Segments**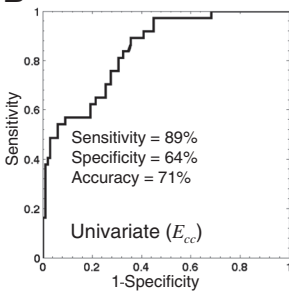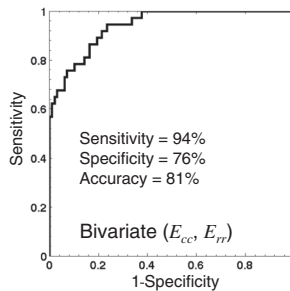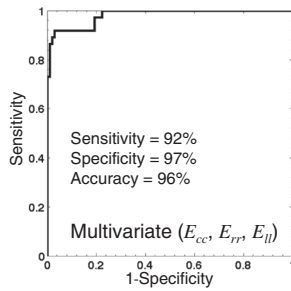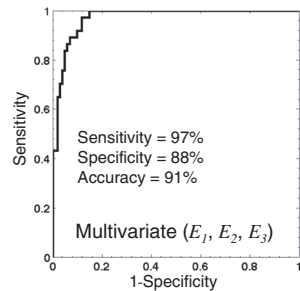

Supplement: MOESM6 [file 9582414]
